# Supplementary material
Source: PubMed Central journal article supplement (PMC7194981)

# Source Data Extended Data 4a, b

## Extended Data 4a

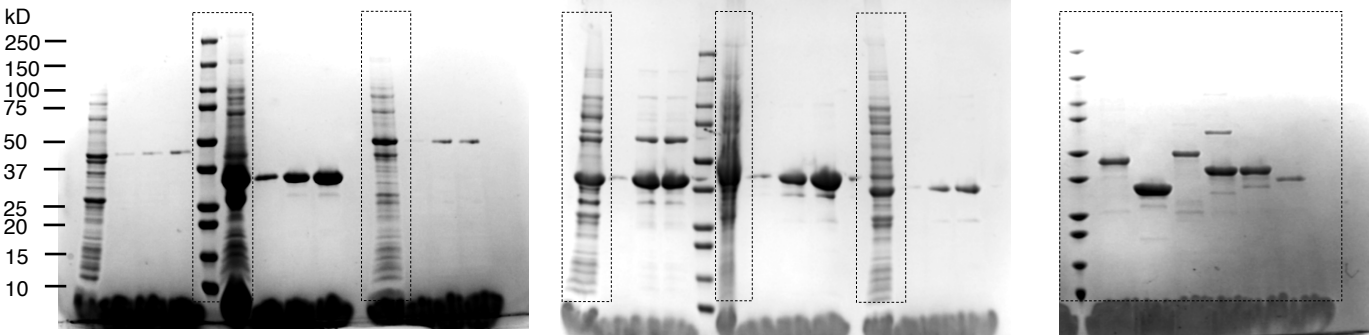

## Extended Data 4b

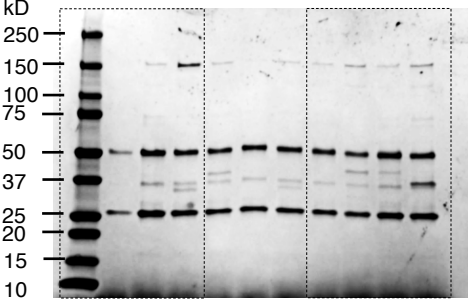

# Source Data Extended Data 4c, d

## Extended Data 4c

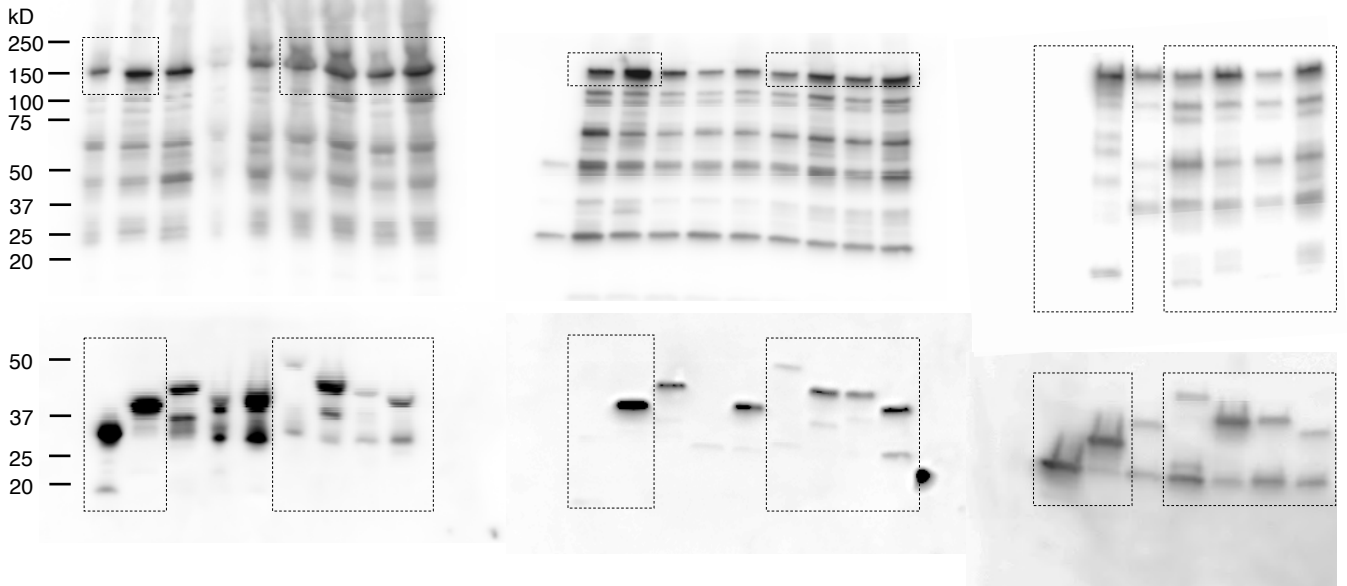

## Extended Data 4d

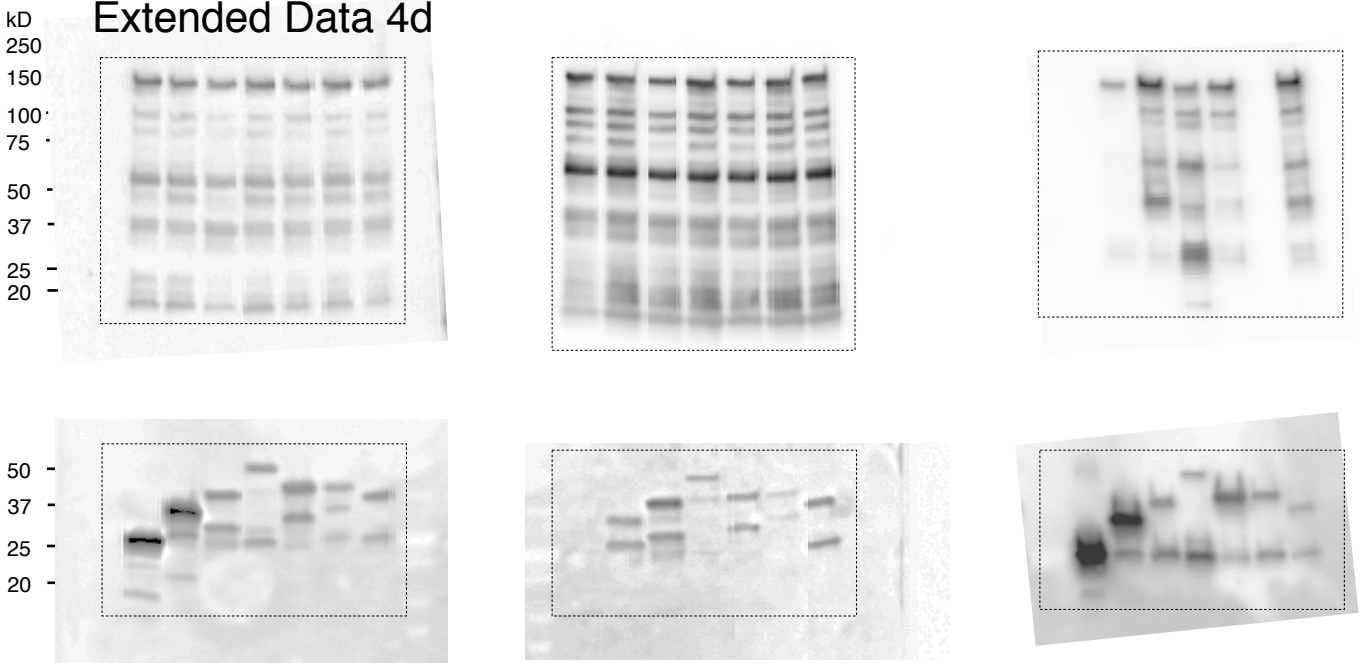

Supplement: NIHMS1562326-supplement-1562326_SourceDataFig4.pdf [file NIHMS1562326-supplement-1562326_SourceDataFig4.pdf]
