# Supplementary material
Source: PubMed Central journal article supplement (PMC7194981)

# Source Data Fig. 3

Fig. 3a

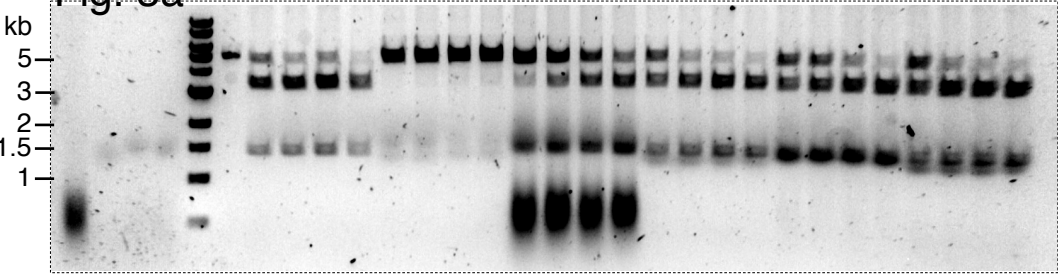

Fig. 3b

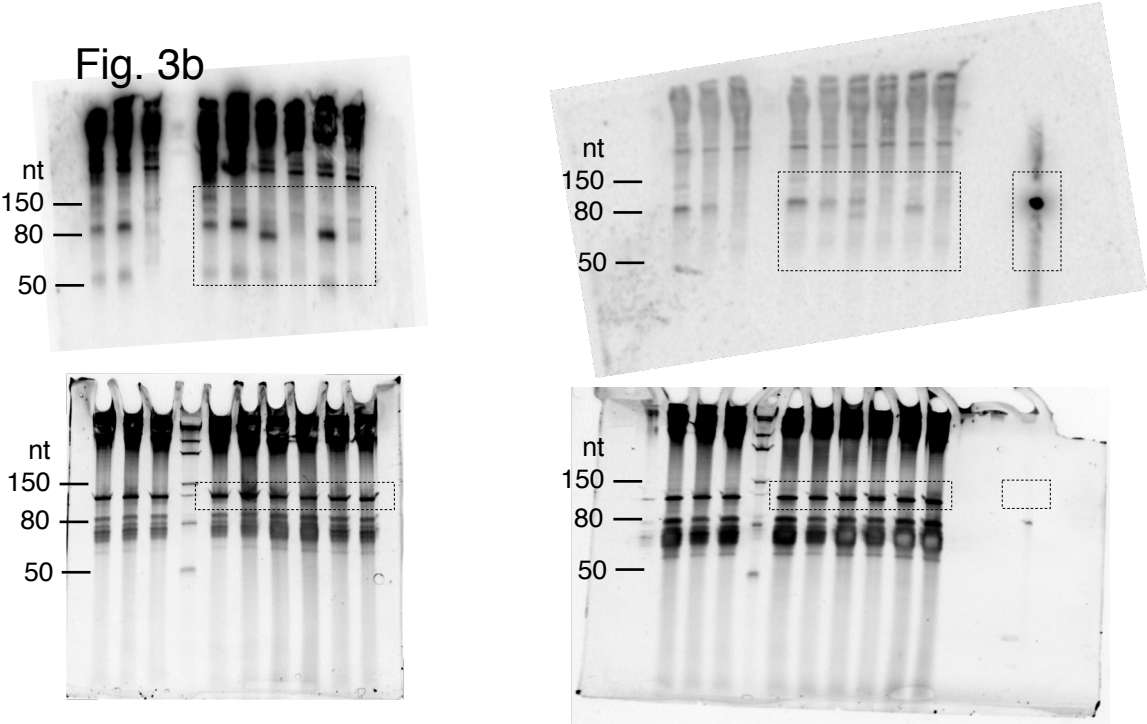

Fig. 3c

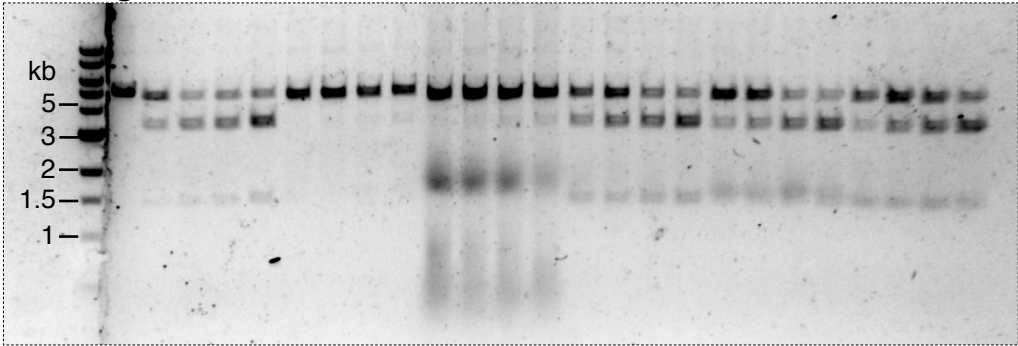

Supplement: NIHMS1562326-supplement-1562326_SourceDataFig3.pdf [file NIHMS1562326-supplement-1562326_SourceDataFig3.pdf]
